# Supplementary material
Source: PubMed Central journal article supplement (PMC4180778)
Supplement: NIHMS603170-supplement-supplement_1.pdf [file NIHMS603170-supplement-supplement_1.pdf]

**Figure S1.** (Top) Body weight changes during placebo and Dexfenfluramine treatment. (Mid) Model-calculated changes in energy intake corresponding to the measured body weight trajectories along with the exponential best-fit curves. (Bottom) Model-calculated placebo-subtracted effect of Dexfenfluramine on energy intake along with the exponential best-fit curve.

**Figure S2.** (Top) Body weight changes during placebo and Diethylpropion treatment. (Mid) Model-calculated changes in energy intake corresponding to the measured body weight trajectories along with the exponential best-fit curves. (Bottom) Model-calculated placebo-subtracted effect of Diethylpropion on energy intake along with the exponential best-fit curve.

**Figure S3.** (Top) Body weight changes during placebo and Exenatide treatment. (Mid) Model-calculated changes in energy intake corresponding to the measured body weight trajectories along with the exponential best-fit curves. (Bottom) Model-calculated placebo-subtracted effect of Exenatide on energy intake along with the exponential best-fit curve.

**Figure S4.** (Top) Body weight changes during placebo and Fenproporex treatment. (Mid) Model-calculated changes in energy intake corresponding to the measured body weight trajectories along with the exponential best-fit curves. (Bottom) Model-calculated placebo-subtracted effect of Fenproporex on energy intake along with the exponential best-fit curve.

**Figure S5.** (Top) Body weight changes during placebo and Fluoxetine treatment. (Mid) Model-calculated changes in energy intake corresponding to the measured body weight trajectories along with the exponential best-fit curves. (Bottom) Model-calculated placebo-subtracted effect of Fluoxetine on energy intake along with the exponential best-fit curve.

**Figure S6.** (Top) Body weight changes during placebo and Liraglutide treatment. (Mid) Model-calculated changes in energy intake corresponding to the measured body weight trajectories along with the exponential best-fit curves. (Bottom) Model-calculated placebo-subtracted effect of Liraglutide on energy intake along with the exponential best-fit curve.

**Figure S7.** (Top) Body weight changes during placebo and Mazindol treatment. (Mid) Model-calculated changes in energy intake corresponding to the measured body weight trajectories along with the exponential best-fit curves. (Bottom) Model-calculated placebo-subtracted effect of Mazindol on energy intake along with the exponential best-fit curve.

**Figure S8.** (Top) Body weight changes during placebo and Naltrexone/Bupropion treatment. (Mid) Model-calculated changes in energy intake corresponding to the measured body weight trajectories along with the exponential best-fit curves. (Bottom) Model-calculated placebo-subtracted effect on energy intake along with the exponential best-fit curve.

**Figure S9.** (Top) Body weight changes during placebo and Orlistat treatment. (Mid) Model-calculated changes in energy intake corresponding to the measured body weight trajectories along with the exponential best-fit curves. (Bottom) Model-calculated placebo-subtracted effect on energy intake along with the exponential best-fit curve.

**Figure S10.** (Top) Body weight changes during placebo and Orlistat treatment. (Mid) Model-calculated changes in energy intake corresponding to the measured body weight trajectories along

with the exponential best-fit curves. (Bottom) Model-calculated placebo-subtracted effect on energy intake along with the exponential best-fit curve.

**Figure S11.** (Top) Body weight changes during placebo and Phentermine/Fenfluramine treatment. (Mid) Model-calculated changes in energy intake corresponding to the measured body weight trajectories along with the exponential best-fit curves. (Bottom) Model-calculated placebo-subtracted effect on energy intake along with the exponential best-fit curve.

**Figure S12.** (Top) Body weight changes during placebo and Phentermine/Topiramate treatment. (Mid) Model-calculated changes in energy intake corresponding to the measured body weight trajectories along with the exponential best-fit curves. (Bottom) Model-calculated placebo-subtracted effect on energy intake along with the exponential best-fit curve.

**Figure S13.** (Top) Body weight changes during placebo and Phentermine/Topiramate treatment. (Mid) Model-calculated changes in energy intake corresponding to the measured body weight trajectories along with the exponential best-fit curves. (Bottom) Model-calculated placebo-subtracted effect on energy intake along with the exponential best-fit curve.

**Figure S14.** (Top) Body weight changes during placebo and Phentermine/Topiramate treatment. (Mid) Model-calculated changes in energy intake corresponding to the measured body weight trajectories along with the exponential best-fit curves. (Bottom) Model-calculated placebo-subtracted effect on energy intake along with the exponential best-fit curve.

**Figure S15.** (Top) Body weight changes during placebo and Rimonabant treatment. (Mid) Model-calculated changes in energy intake corresponding to the measured body weight trajectories along with the exponential best-fit curves. (Bottom) Model-calculated placebo-subtracted effect on energy intake along with the exponential best-fit curve.

**Figure S16.** (Top) Body weight changes during placebo and Sibutramine treatment. (Mid) Model-calculated changes in energy intake corresponding to the measured body weight trajectories along with the exponential best-fit curves. (Bottom) Model-calculated placebo-subtracted effect on energy intake along with the exponential best-fit curve.

**Figure S17.** (Top) Body weight changes during placebo and Sibutramine treatment. (Mid) Model-calculated changes in energy intake corresponding to the measured body weight trajectories along with the exponential best-fit curves. (Bottom) Model-calculated placebo-subtracted effect on energy intake along with the exponential best-fit curve.

**Figure S18.** (Top) Body weight changes during placebo and Sibutramine treatment. (Mid) Model-calculated changes in energy intake corresponding to the measured body weight trajectories along with the exponential best-fit curves. (Bottom) Model-calculated placebo-subtracted effect on energy intake along with the exponential best-fit curve.

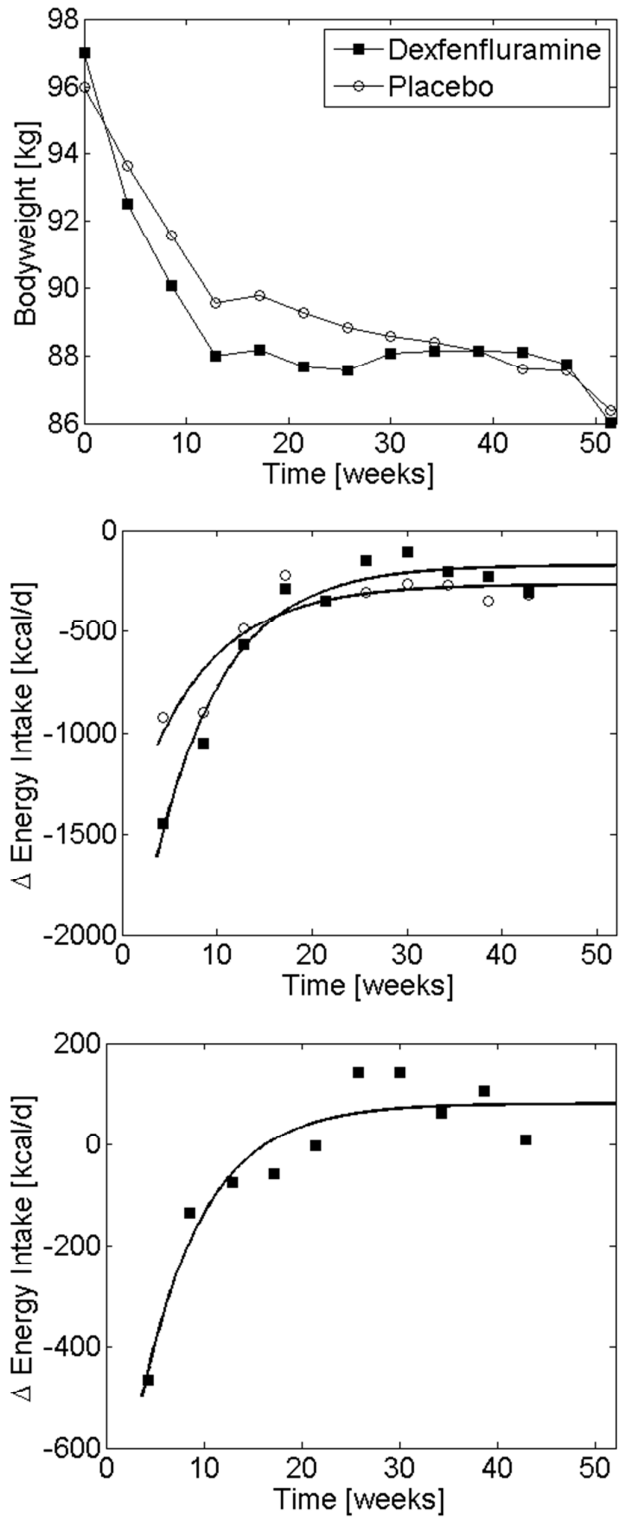

Figure S1.

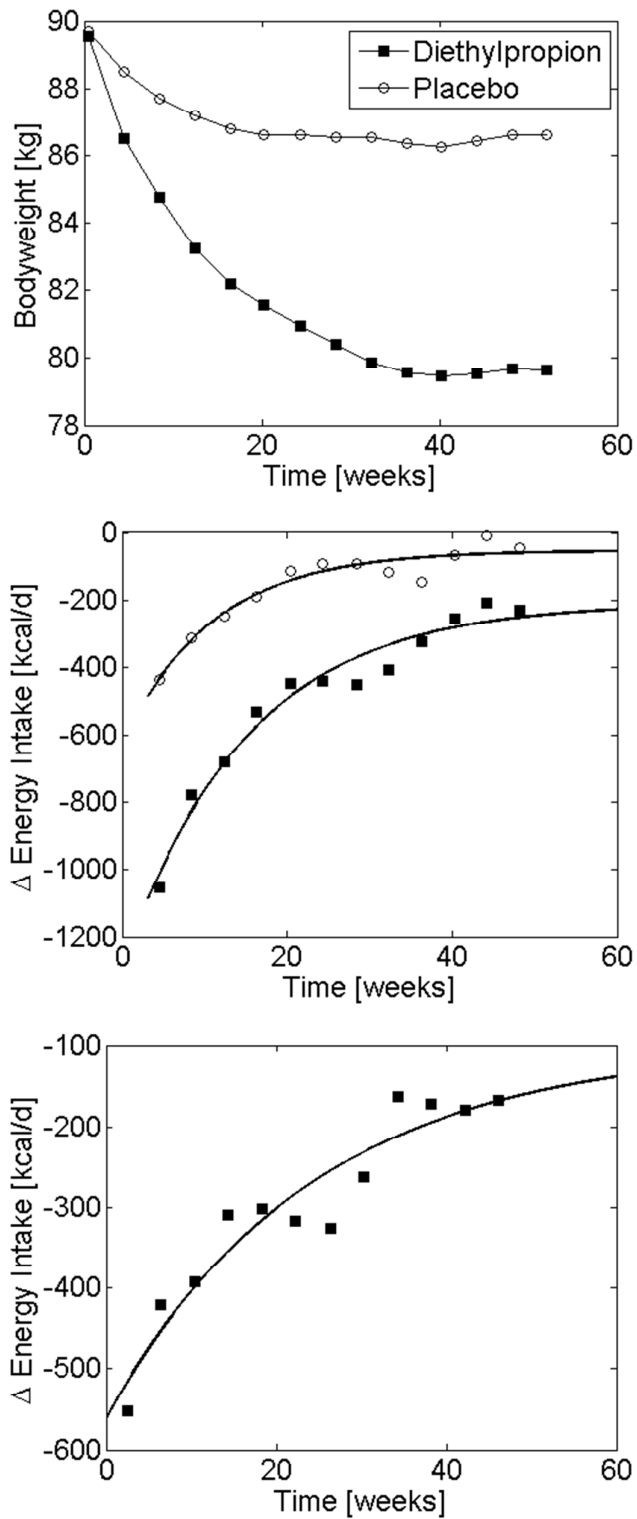

Figure S2.

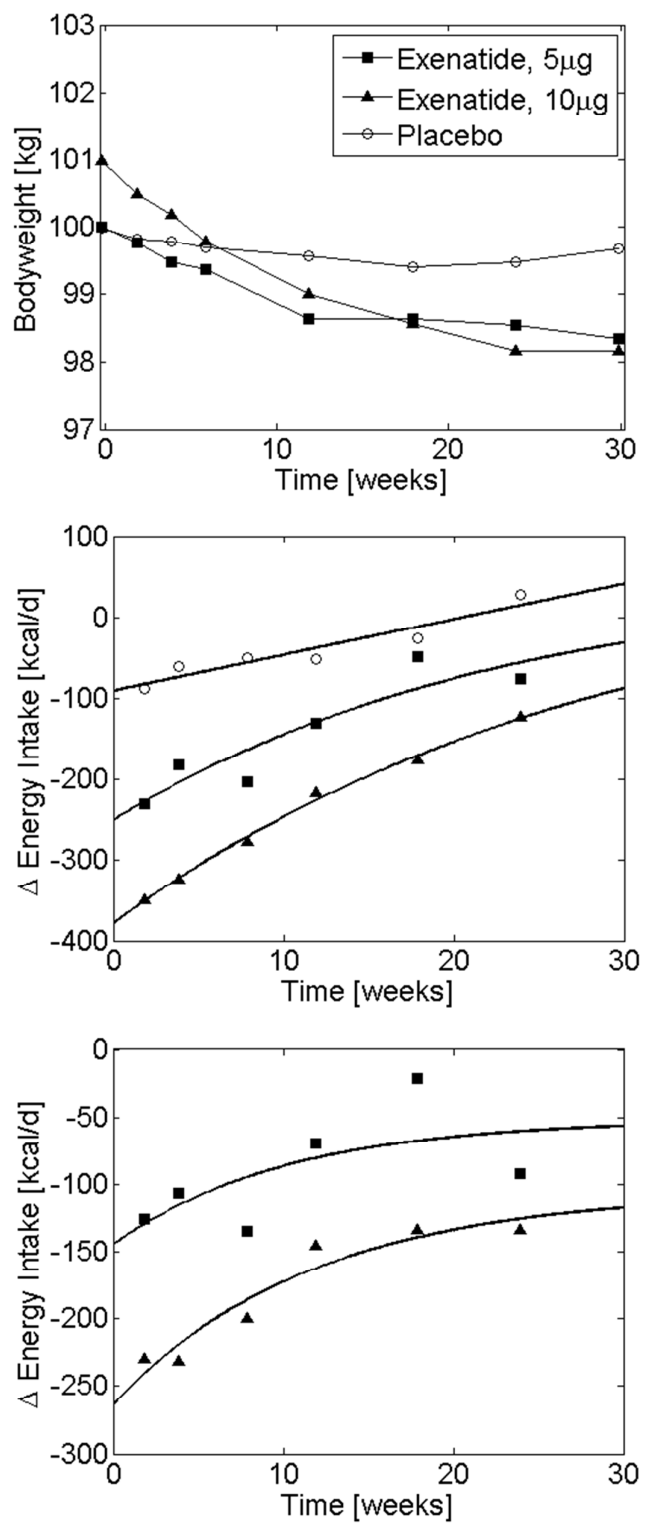

Figure S3.

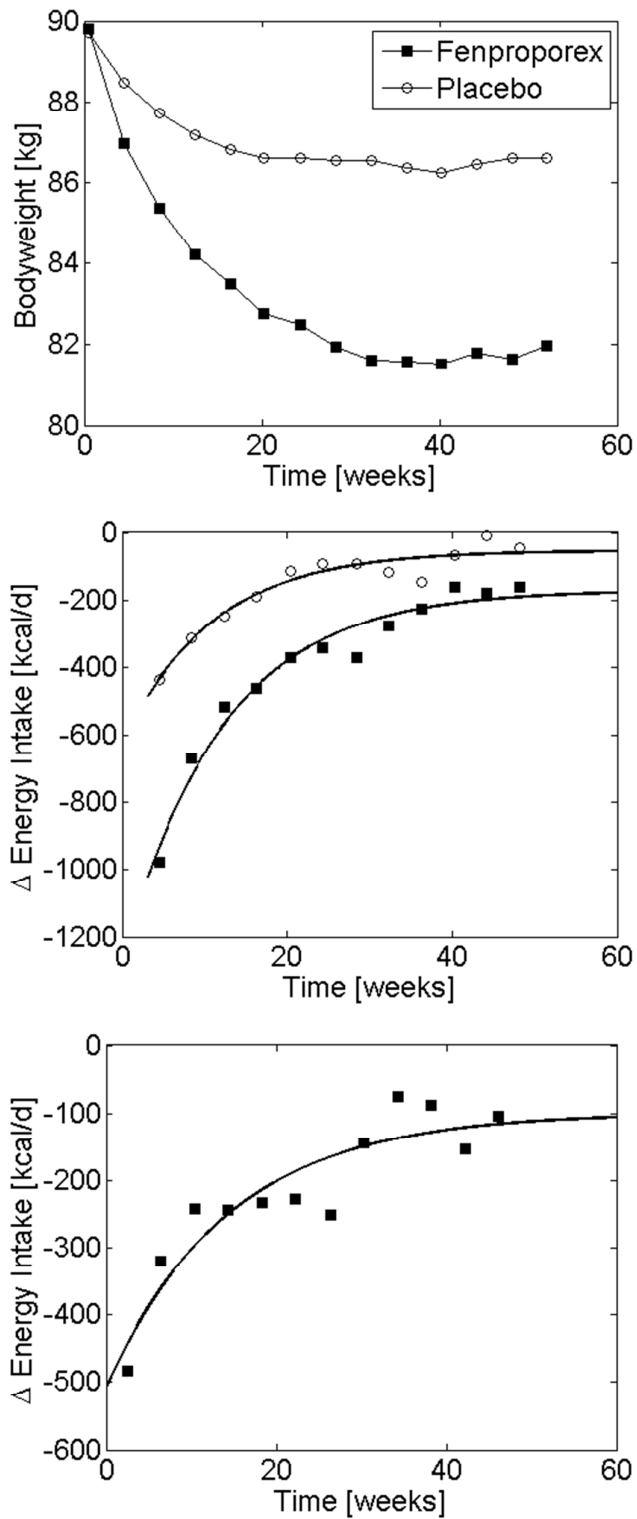

Figure S4.

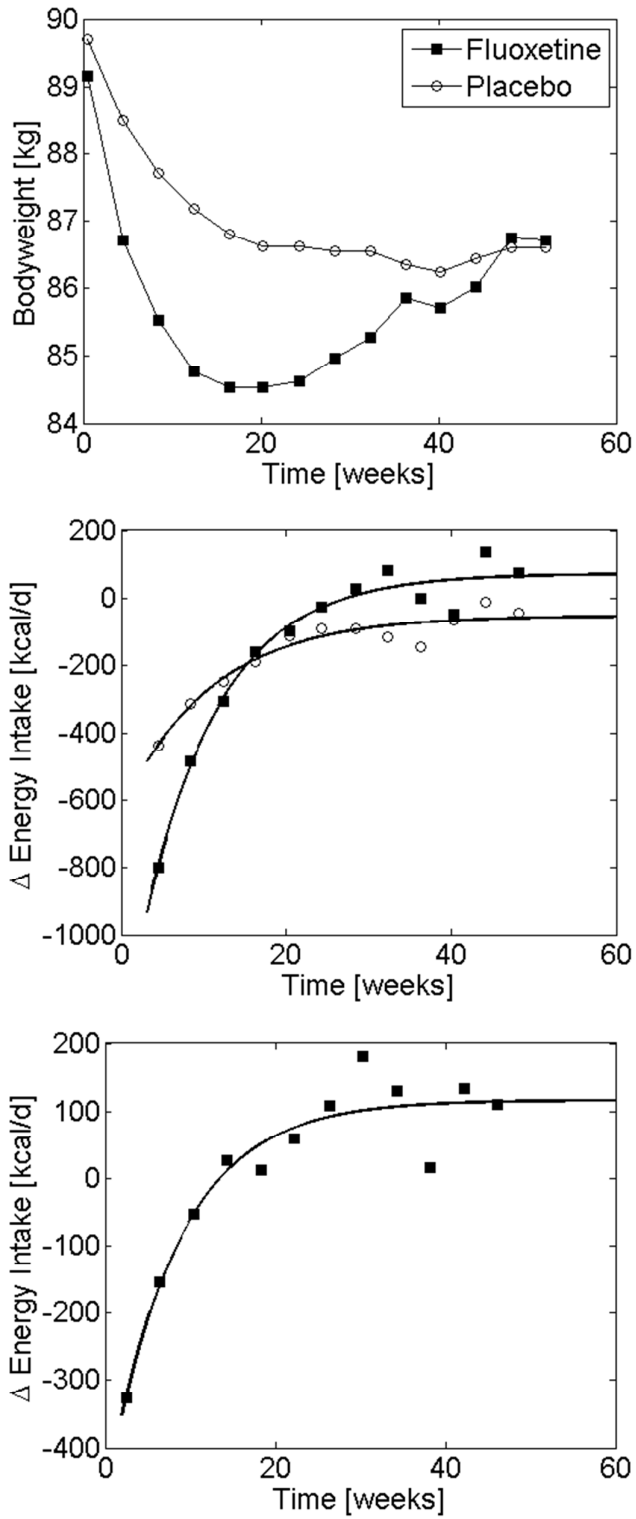

Figure S5.

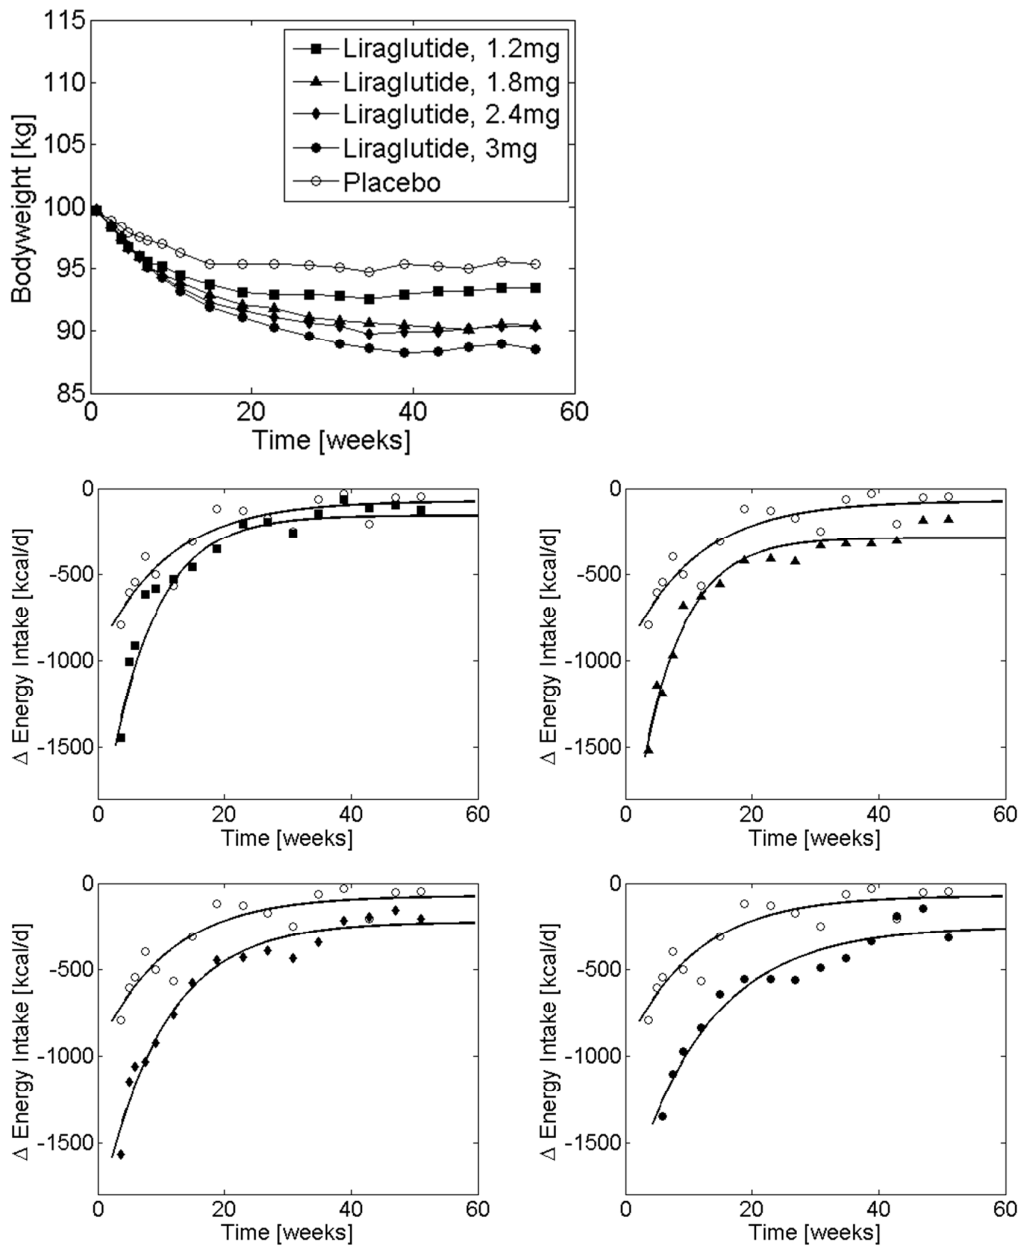



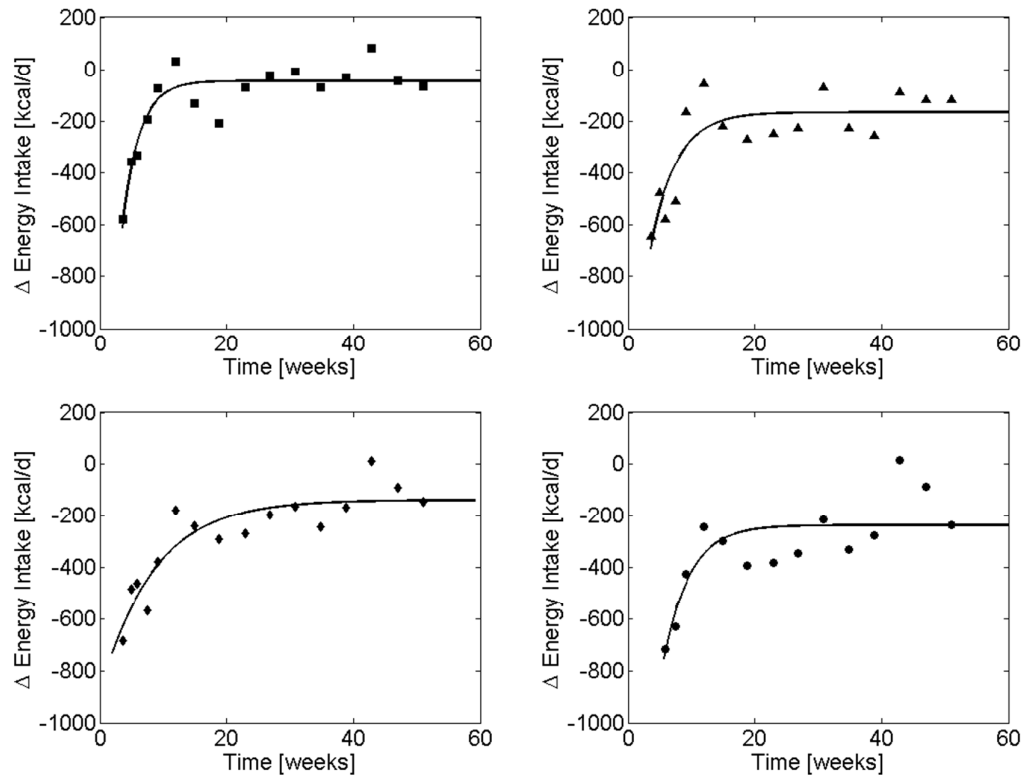

Figure S6.

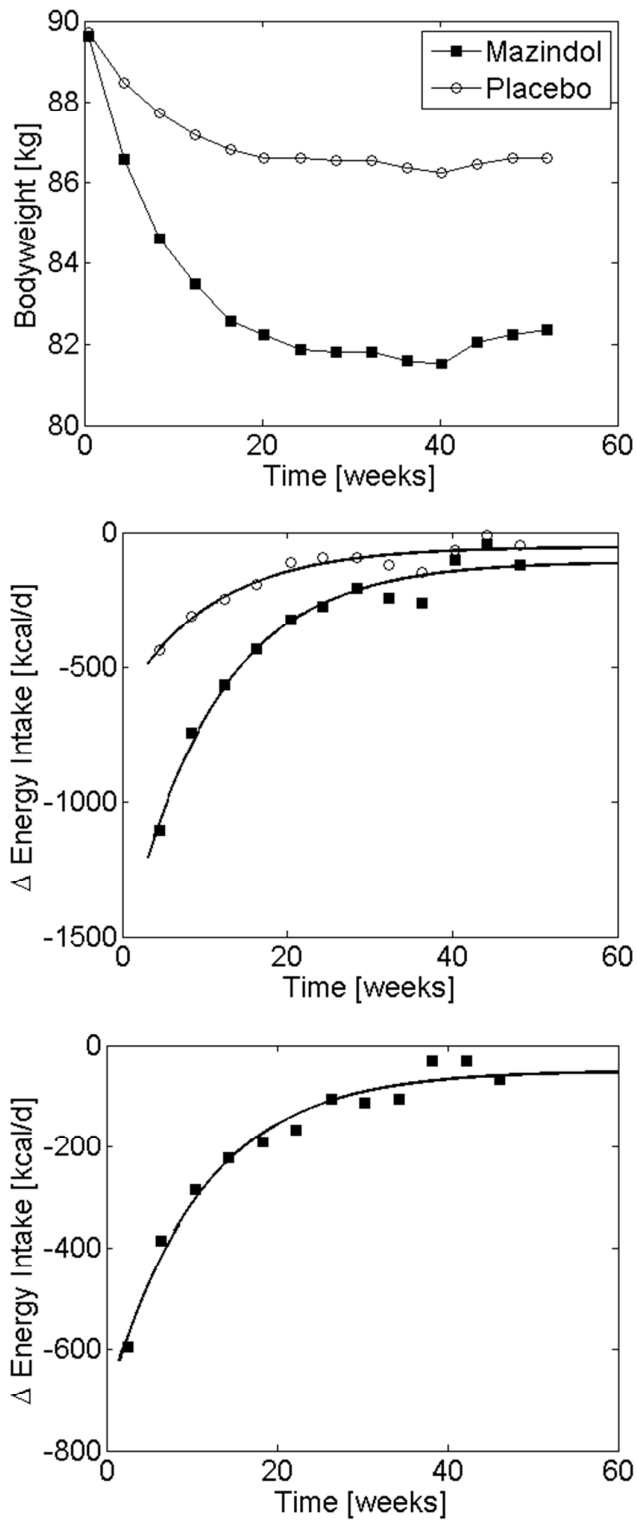

Figure S7.

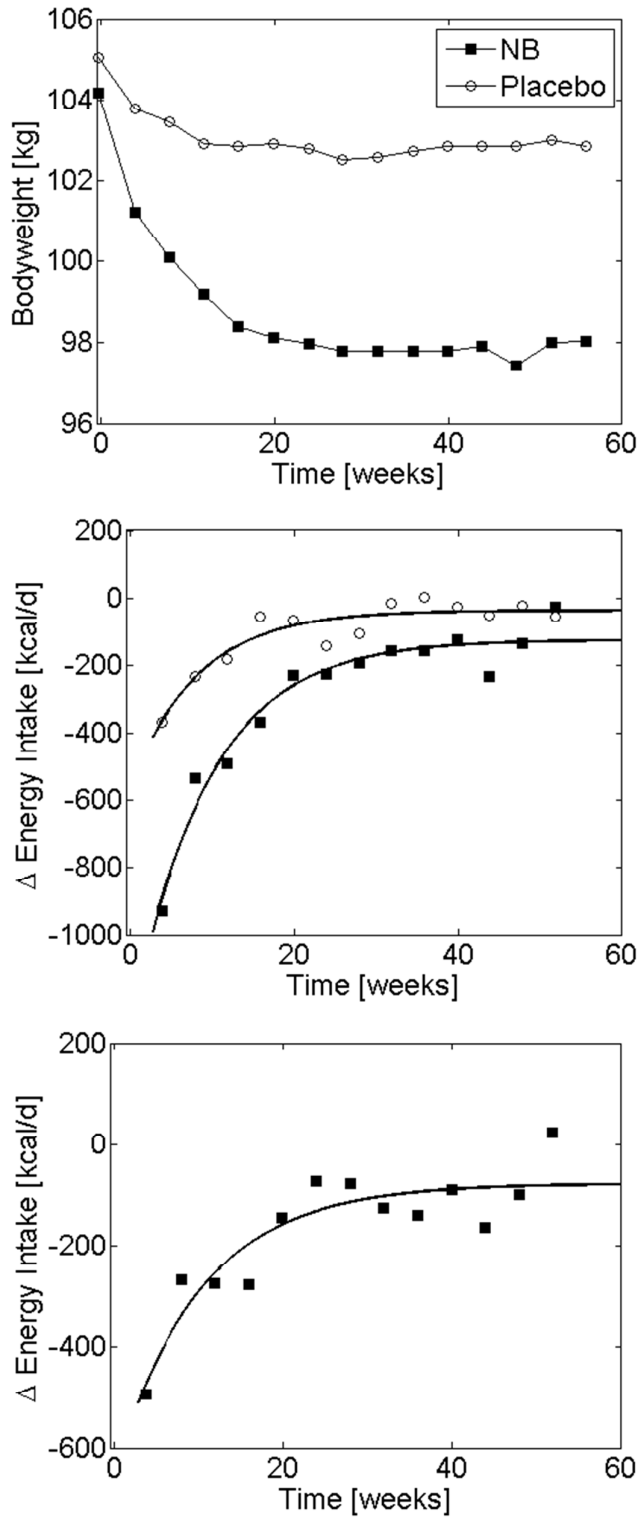

Figure S8.

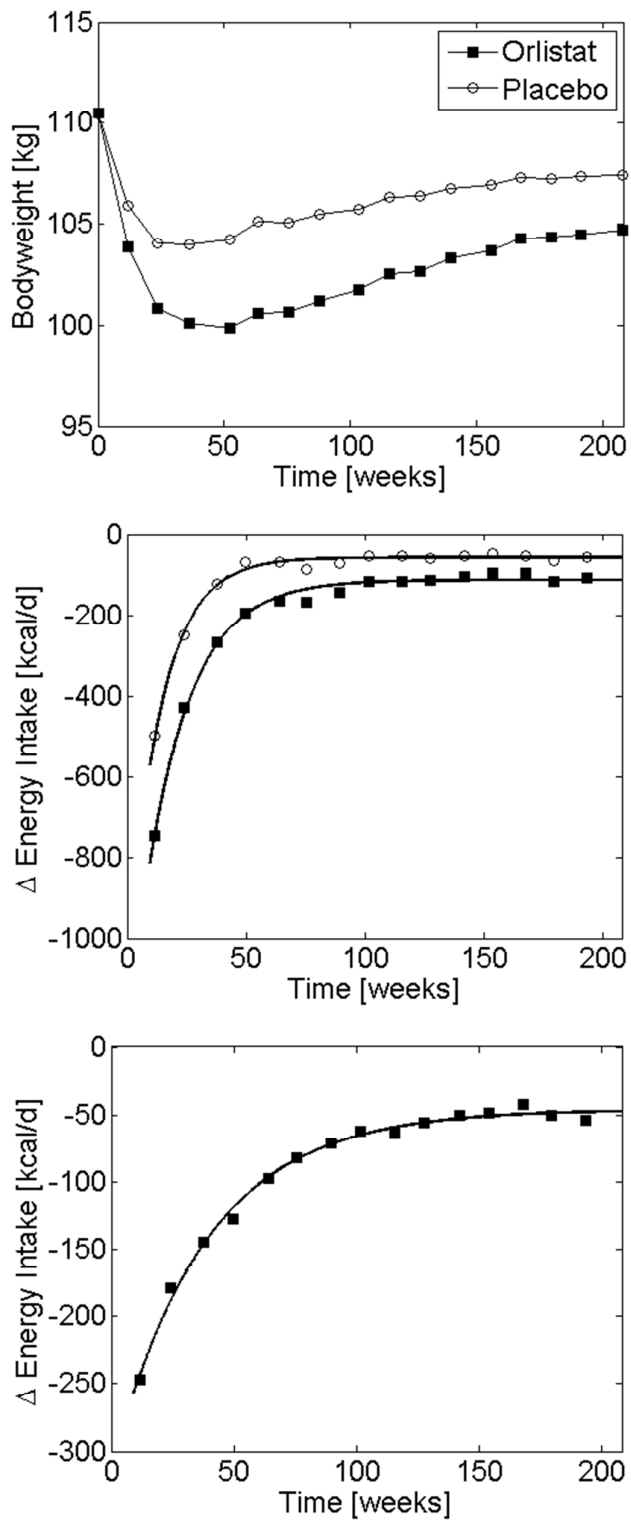

Figure S9.

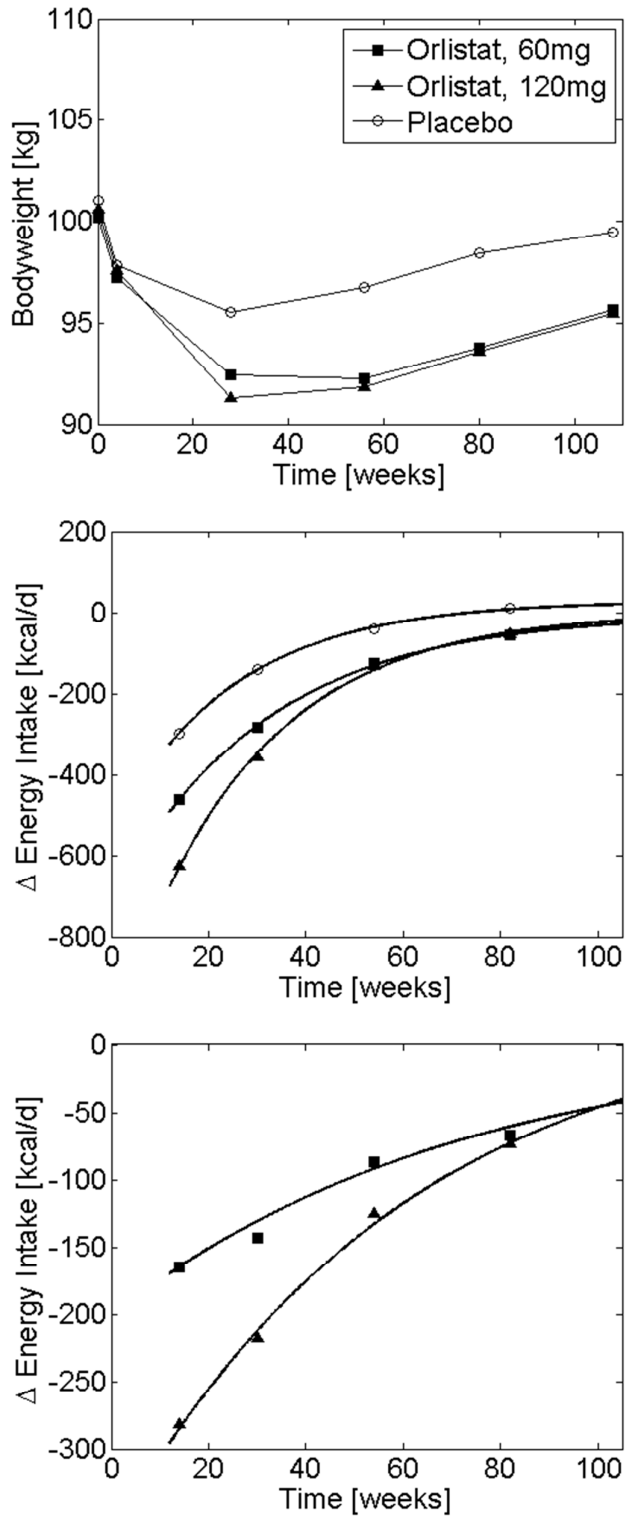

Figure S10.

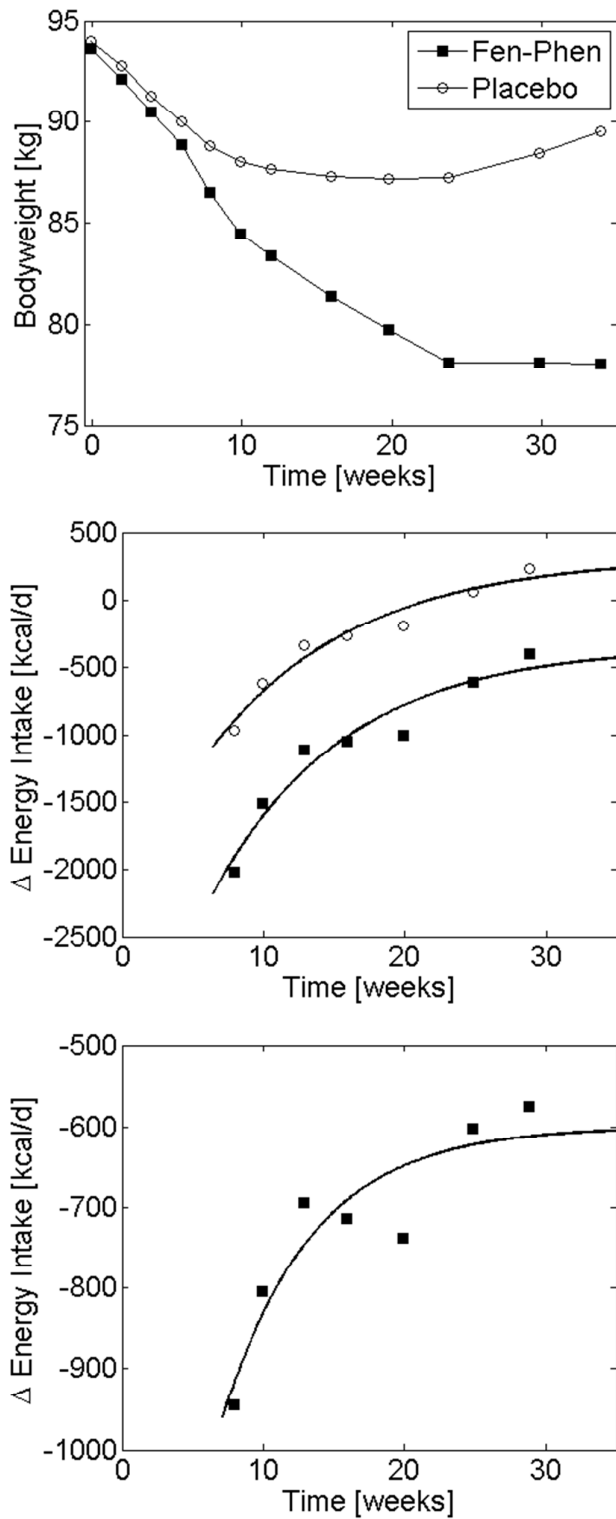

Figure S11.

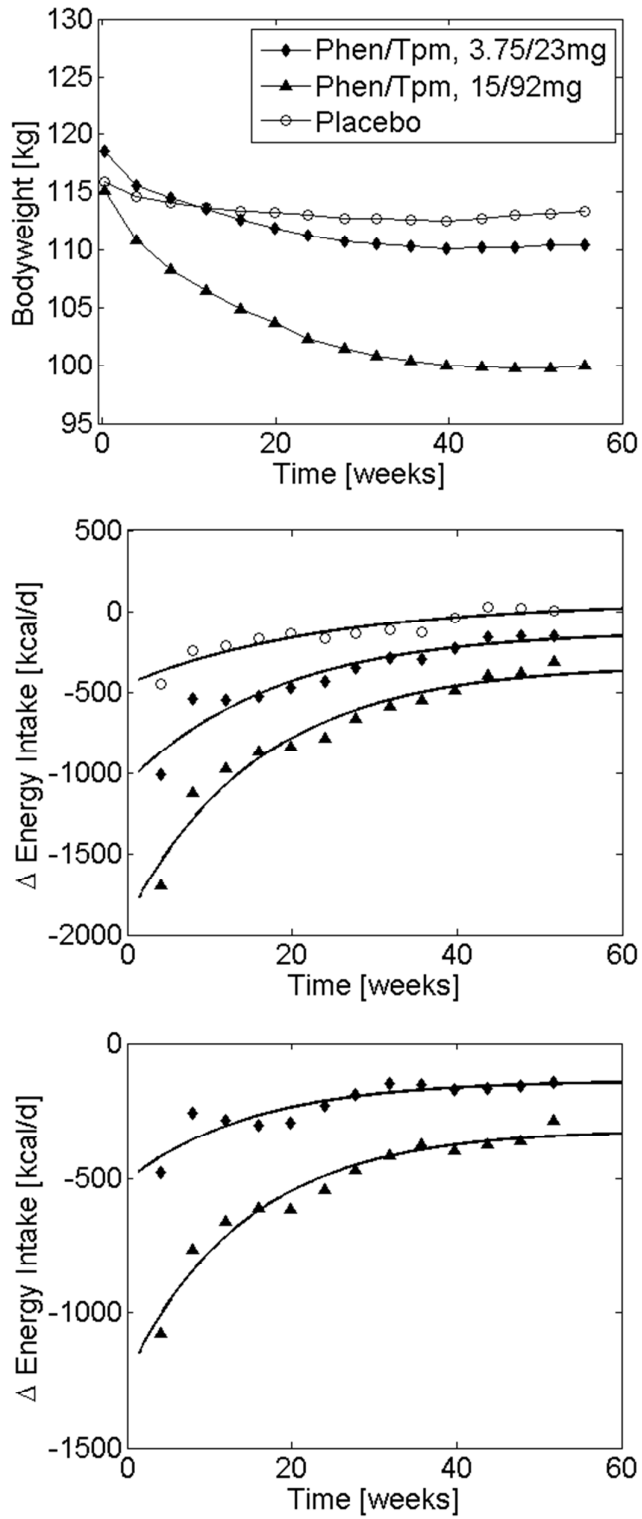

Figure S12.

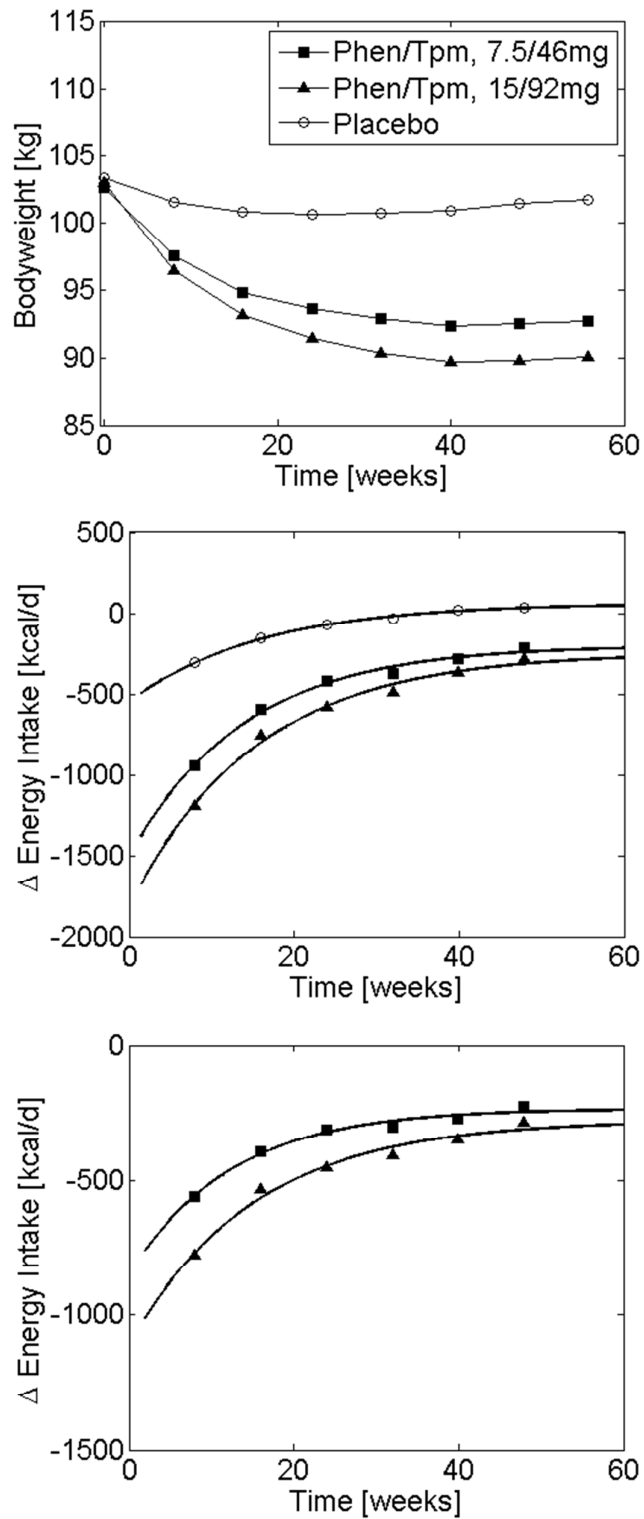

Figure S13.



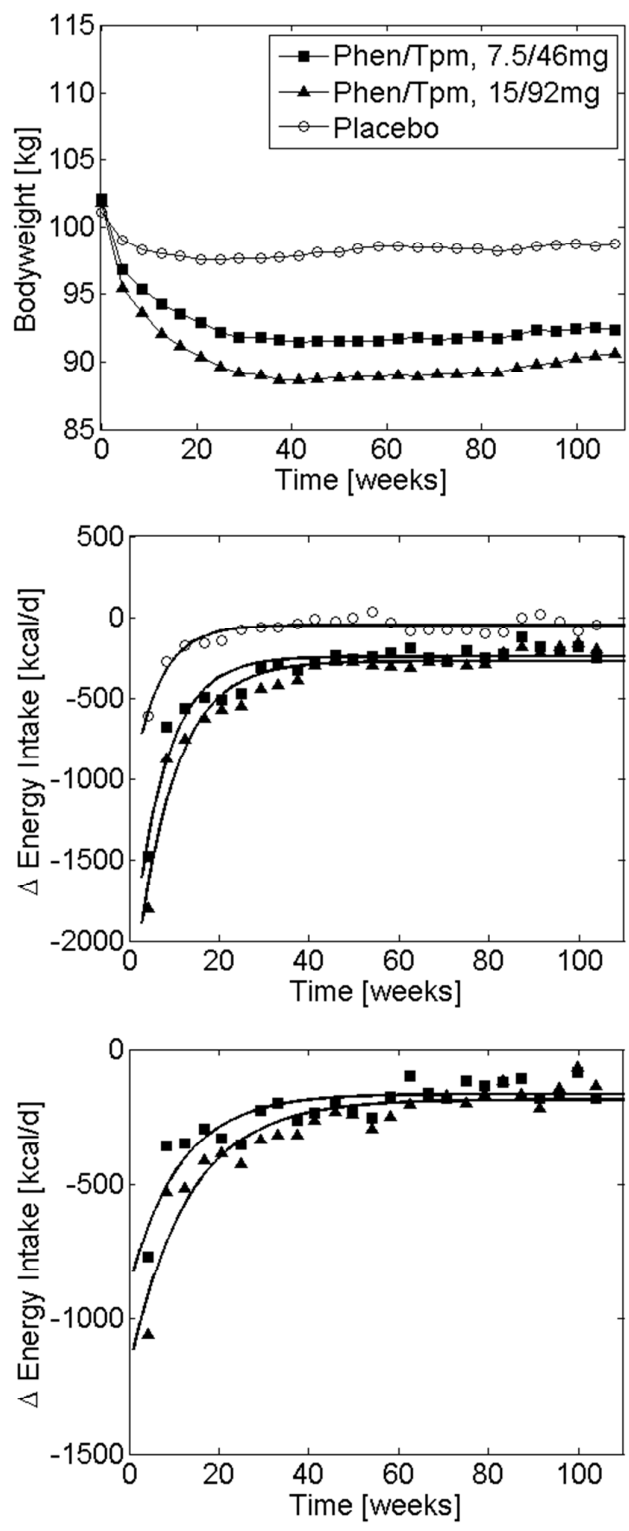

Figure S14.

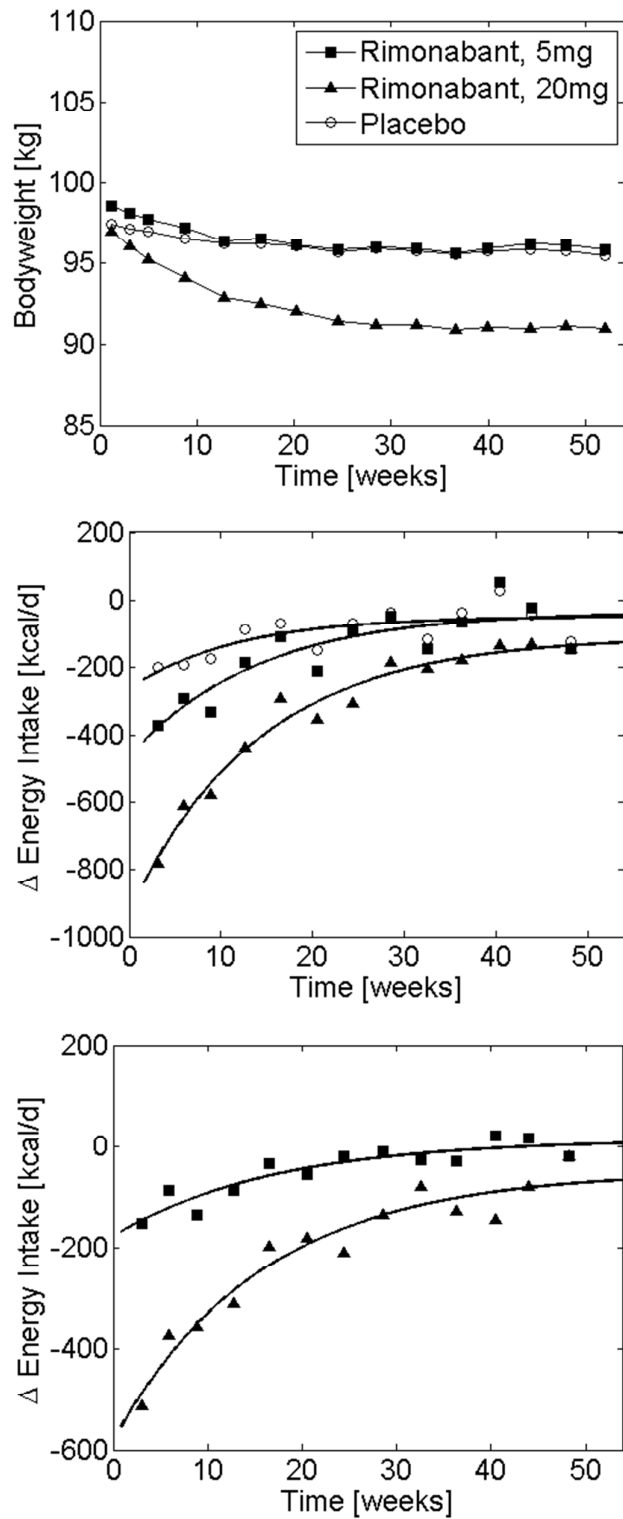

Figure S15.

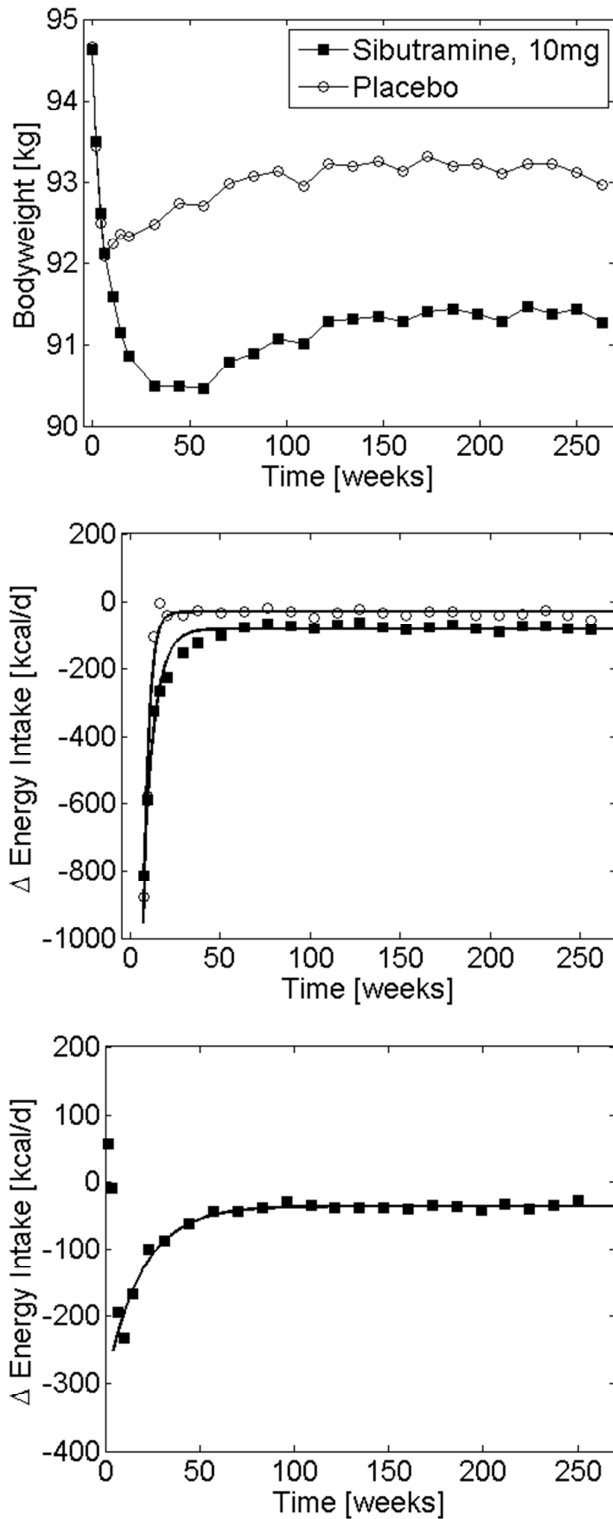

Figure S16.

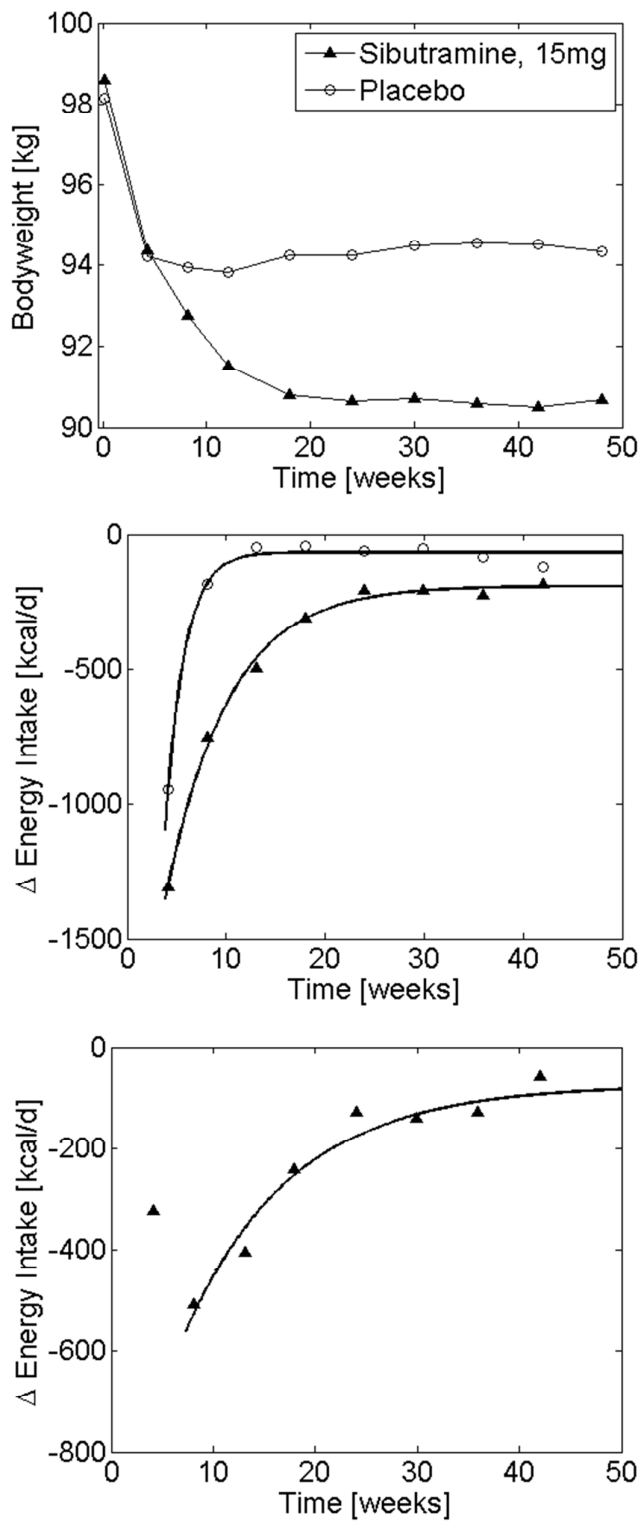

Figure S17.

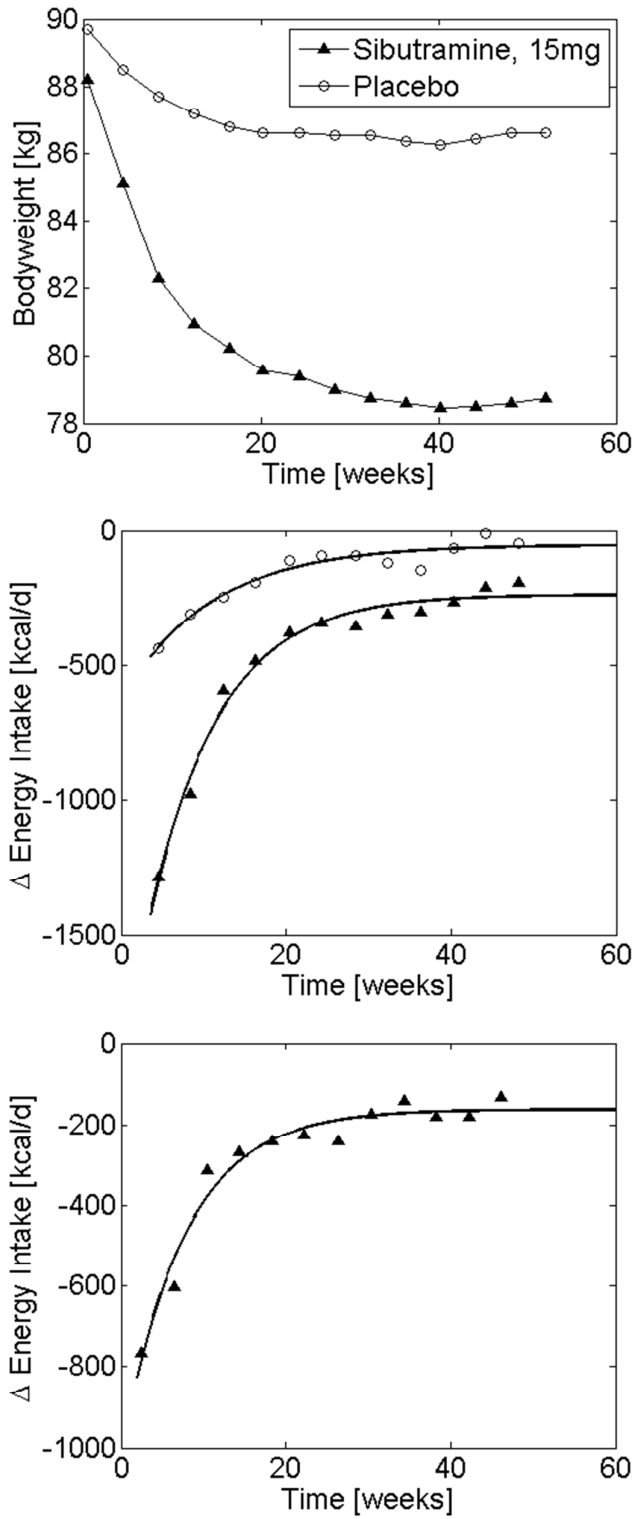

Figure S18.

| Drug                          | $P_{\text{early}}$<br>[kcal/d] | $\tau$<br>[d] | $P_{\text{late}}$<br>[kcal/d] | $R^2$ | Duration<br>[weeks] | Dose<br>[mg]                  | Ref. |
|-------------------------------|--------------------------------|---------------|-------------------------------|-------|---------------------|-------------------------------|------|
| Dexfenfluramine               | 850                            | 50            | 269                           | 0.81  | 52                  | 15                            | (18) |
| Diethylpropion                |                                |               |                               |       |                     | DEP: 75,                      |      |
| Fenproporex                   |                                |               |                               |       |                     | FPX: 25                       |      |
| Fluoxetine                    | 386                            | 78            | 47                            | 0.93  | 52                  | FXT: 20,                      | (21) |
| Mazindol                      |                                |               |                               |       |                     | MZD: 2,                       |      |
| Sibutramine                   |                                |               |                               |       |                     | SIB: 15                       |      |
| Exenatide*                    | -                              | -             | -                             | -     | 30                  | 0.005, 0.01                   | (12) |
| Liraglutide                   | 653                            | 64            | 48                            | 0.88  | 52                  | 1.2, 1.8, 2.4, 3              | (11) |
| Lorcaserin                    | 528                            | 78            | 40                            | 0.94  | 104                 | 10                            | (20) |
| Naltrexone +<br>Bupropion     | 309                            | 55            | 32                            | 0.87  | 56                  | N/B<br>32/360                 | (16) |
| Orlistat                      | 492                            | 99            | 57                            | 0.99  | 208                 | 120                           | (22) |
|                               | 261                            | 174           | -26                           | 0.99  | 104                 | 60                            | (15) |
|                               | 306                            | 138           | -32                           | 0.99  | 104                 | 120                           | (15) |
| Phentermine +<br>Fenfluramine | 690                            | 80            | -411                          | 0.96  | 34                  | Phen/Fen<br>15/60             | (23) |
| Phentermine +<br>Topiramate   | 269                            | 194           | -61                           | 0.87  | 56                  | PHEN/TPM<br>3.75/23,<br>15/92 | (10) |
|                               | 261                            | 112           | -55                           | 0.99  | 56                  | PHEN/TPM<br>7.5/46,<br>15/92  | (13) |
|                               | 536                            | 40            | 43                            | 0.9   | 108                 | PHEN/TPM<br>7.5/46,<br>15/92  | (14) |
| Rimonabant                    | 181                            | 97            | 38                            | 0.54  | 52                  | 5, 20                         | (19) |
| Sibutramine**                 | -                              | -             | -                             | -     | 260                 | 10                            | (17) |
|                               | 842                            | 13            | 59                            | 0.99  | 48                  | 15                            | (24) |

**Supplementary Table 1:** Parameter values defining the best-fit exponential time course of metabolizable energy intake in placebo groups alone. \*The calculated changes in metabolizable energy intake for the placebo group in the Exenatide trial decreased linearly in time. \*\*Calculated changes in energy intake in the placebo group in this Sibutramine trial were approximately constant.

| Drug                                  | $P^{\text{early}}$<br>[kcal/d] | $\tau$<br>[d] | $P^{\text{late}}$<br>[kcal/d] | $R^2$ | Duration<br>[weeks] | Dose<br>[mg]        | Ref. |
|---------------------------------------|--------------------------------|---------------|-------------------------------|-------|---------------------|---------------------|------|
| <b>Dexfenfluramine</b>                | 1269                           | 44            | 228                           | 0.86  | 52                  | 15                  | (18) |
| <b>Diethylpropion</b>                 | 899                            | 109           | 185                           | 0.96  | 52                  | 75                  | (21) |
| <b>Exenatide</b>                      | 201                            | 163           | -46                           | 0.85  | 30                  | 0.005               | (12) |
|                                       | 310                            | 207           | -70                           | 0.99  | 30                  | 0.01                | (12) |
| <b>Fenproporex</b>                    | 827                            | 88            | 151                           | 0.97  | 52                  | 25                  | (21) |
| <b>Fluoxetine</b>                     | 709                            | 66            | -66                           | 0.97  | 52                  | 20                  | (21) |
| <b>Liraglutide</b>                    | 1147                           | 59            | 213                           | 0.9   | 52                  | 3                   | (11) |
|                                       | 1318                           | 56            | 190                           | 0.98  | 52                  | 2.4                 | (11) |
|                                       | 1377                           | 39            | 231                           | 0.96  | 52                  | 1.8                 | (11) |
|                                       | 1221                           | 35            | 112                           | 0.95  | 52                  | 1.2                 | (11) |
| <b>Lorcaserin</b>                     | 954                            | 101           | 85                            | 0.94  | 104                 | 10                  | (20) |
| <b>Mazindol</b>                       | 956                            | 78            | 96                            | 0.97  | 52                  | 2                   | (21) |
| <b>Naltrexone +<br/>Bupropion</b>     | 766                            | 63            | 108                           | 0.95  | 56                  | N/B<br>32/360       | (16) |
|                                       |                                |               |                               |       |                     |                     |      |
| <b>Orlistat</b>                       | 728                            | 136           | 112                           | 0.99  | 208                 | 120                 | (22) |
|                                       | 409                            | 220           | 2                             | 0.99  | 104                 | 60                  | (15) |
|                                       | 556                            | 191           | -3                            | 0.99  | 104                 | 120                 | (15) |
| <b>Phentermine +<br/>Fenfluramine</b> | 1560                           | 73            | 165                           | 0.94  | 34                  | Phen/Fen<br>15/60   | (23) |
| <b>Phentermine +<br/>Topiramate</b>   | 615                            | 143           | 72                            | 0.91  | 56                  | PHEN/TPM<br>3.75/23 | (10) |
|                                       | 1131                           | 127           | 227                           | 0.96  | 56                  | PHEN/TPM<br>15/92   | (10) |
|                                       | 805                            | 97            | 174                           | 0.99  | 56                  | PHEN/TPM<br>7.5/46  | (13) |
|                                       | 1010                           | 107           | 213                           | 0.99  | 56                  | PHEN/TPM<br>15/92   | (13) |
|                                       | 1262                           | 44            | 219                           | 0.92  | 108                 | PHEN/TPM<br>7.5/46  | (14) |
|                                       | 1523                           | 54            | 246                           | 0.92  | 108                 | PHEN/TPM<br>15/92   | (14) |
| <b>Rimonabant</b>                     | 321                            | 110           | 22                            | 0.73  | 52                  | 5                   | (19) |
|                                       | 649                            | 114           | 81                            | 0.96  | 52                  | 20                  | (19) |
| <b>Sibutramine</b>                    | 173                            | 111           | 13                            | 0.98  | 260                 | 10                  | (17) |
|                                       | 1158                           | 43            | 172                           | 0.99  | 48                  | 15                  | (24) |
|                                       | 1161                           | 61            | 214                           | 0.98  | 52                  | 15                  | (21) |

**Supplementary Table 2:** Parameter values defining the best-fit exponential time course of metabolizable energy intake in treatment groups alone.
